# Supplementary material for: A highly specific sodium aptamer probed by 2-aminopurine for robust Na+ sensing
Source: PubMed Central journal article supplement — Nucleic Acids Res. 2016 Sep 20;44(21):10377–85. doi: 10.1093/nar/gkw845 (PMC5137442; doi:10.1093/nar/gkw845), 2016-09-20
Supplement: supp_gkw845_nar-01631-f-2016-File008.pdf [file supp_gkw845_nar-01631-f-2016-File008.pdf]

## Supplementary Data

### **A highly specific sodium aptamer probed by 2-aminopurine for robust Na<sup>+</sup> sensing**

Wenhu Zhou<sup>1,2</sup>, Jinsong Ding<sup>1</sup> and Juewen Liu<sup>1,2,\*</sup>

<sup>1</sup>. School of Pharmaceutical Sciences, Central South University, Changsha, Hunan, China,  
410013.

<sup>2</sup>. Department of Chemistry, Waterloo Institute for Nanotechnology, University of Waterloo,  
Waterloo, Ontario, Canada, N2L 3G1.

\*Email: liujw@uwaterloo.ca

Fax: (+1) 519-746-0435

Phone: (+1) 519-888-4567 extension 38919

**Table S1.** DNA oligonucleotides used in this study. [2AP] = 2-aminopurine; r[2AP] = ribo-2-aminopurine; rA = ribo-adenine; FAM = carboxyfluorescein.

| DNA name                                    | Sequences and modifications (from 5' -terminus)                    |
|---------------------------------------------|--------------------------------------------------------------------|
| Ce13d                                       | TTTCGCCATAGGTCAAAGGTGGGTGCGAGTTTTTACTCGTTATAGTGACTCGTGAC           |
| NaA43                                       | TTTCGCCATCCAGGTCAAAGGTGGGTGAGGGGACGCCAAGAGTCCCCGGGTTAGTGACTCGTGAC  |
| 17E                                         | TTTCGCCATCTTCTCCGAGCCGGTTCGAAATAGTGACTCGTGAC                       |
| Ce13d-A <sub>20</sub>                       | TTTCGCCATAGGTCAAAGGTGGGTGCGAGTTTTTACTCGTAATAGTGACTCGTGAC           |
| Ce13d-C <sub>20</sub>                       | TTTCGCCATAGGTCAAAGGTGGGTGCGAGTTTTTACTCGTCATAGTGACTCGTGAC           |
| Ce13d-G <sub>20</sub>                       | TTTCGCCATAGGTCAAAGGTGGGTGCGAGTTTTTACTCGTGATAGTGACTCGTGAC           |
| Ce13d-A <sub>10</sub> C                     | TTTCGCCATAGGTCAACGGTGGGTGCGAGTTTTTACTCGTTATAGT GAC TCG TGA C       |
| Ce13d-G <sub>14</sub> T                     | TTTCGCCATAGGTCAAAGGTTGGTGGCGAGTTTTTACTCGTTATAGTGACTCGTGAC          |
| Ce13d-A <sub>3</sub> G                      | TTTCGCCATGGGTCAAAGGTGGGTGCGAGTTTTTACTCGTTATAGTGACTCGTGAC           |
| Ce13d-A <sub>8</sub> G                      | TTTCGCCATAGGTCAAGGTGGGTGCGAGTTTTTACTCGTTATAGTGACTCGTGAC            |
| Ce13d-G <sub>14</sub> A                     | TTTCGCCATAGGTCAAAGGTAGGTGCGAGTTTTTACTCGTTATAGTGACTCGTGAC           |
| Ce13d-T <sub>17</sub> C                     | TTTCGCCATAGGTCAAAGGTGGGCG CGA GTT TTT ACT CGT TAT AGT GAC TCG TGAC |
| Ce13d-A <sub>10</sub> C+ T <sub>20</sub> A  | TTTCGCCATAGGTCAACGGTGGGTGCGAGTTTTTACTCGTAATAGTGACTCGTGAC           |
| Ce13d-G <sub>14</sub> T + T <sub>20</sub> A | TTTCGCCATAGGTCAAAGGTTGGTGGCGAGTTTTTACTCGTAATAGTGACTCGTGAC          |
| Ce13d-A <sub>8</sub> 2AP                    | TTTCGCCATAGGTC[2AP]AAGGTGGGTGCGAGTTTTTACTCGTTATAGTGACTCGTGAC       |
| Ce13d-A <sub>9</sub> 2AP                    | TTTCGCCATAGGTCA[2AP]AGGTGGGTGCGAGTTTTTACTCGTTATAGTGACTCGTGAC       |
| Sub-FAM                                     | GTCACGAGTCACTATrAGGAAGATGGCGAAA-FAM                                |
| Sub-dA                                      | GTCACGAGTCACTATAGGAAGATGGCGAAA                                     |
| Sub-ribo-2AP                                | GTCACGAGTCACTATr[2AP]GGAAGATGGCGAAA                                |
| Sub-deoxyribo-2AP                           | GTCACGAGTCACTAT[2AP]GGAAGATGGCGAAA                                 |



**Figure S1.** The secondary structures of the (A) Ce13d and (B) NaA43 predicted by the Mfold program (1). Based on the Mfold prediction, both structures contain a small hairpin in their identical loop in red. However, our biochemical characterizations (2) do not support such a small hairpin. Therefore, we draw the secondary structure of the Ce13d as in (C) and that of the NaA43 in (D) in the main paper.



**Figure S2.** (A) To further confirm that 2AP modification does not disrupt  $\text{Na}^+$  binding, we characterized the  $\text{Na}^+$ -induced Ce13d global folding using  $\text{Tb}^{3+}$ -sensitized luminescence by following the method we previously introduced (3,4). Sensitized  $\text{Tb}^{3+}$  luminescence spectra with the 2AP-labeled Ce13d in buffer (25 mM  $\text{Li}^+$ , 50 mM Tris, pH 7.5) and after further adding 25 mM  $\text{Li}^+$  or  $\text{Na}^+$ . The DNazymes were prepared with Sub-ribo-2AP substrate and the enzyme (each 1  $\mu\text{M}$ , see Table S1 for sequences). After annealing, various concentrations of  $\text{Li}^+/\text{Na}^+$  were added. Then, 5  $\mu\text{M}$   $\text{Tb}^{3+}$  was added, followed by monitoring the spectra from 520 to 570 nm by exciting at 290 nm. The peak intensity at 543 nm was quantified. The addition of  $\text{Na}^+$  cause stronger fluorescence decrease which is attributable to the specific  $\text{Na}^+$  binding, otherwise  $\text{Li}^+$  would decrease more due to its higher charge density. (B) To have quantitative understanding, a careful titration was performed. Normalized  $\text{Tb}^{3+}$  luminescence of the 2AP-modified Ce13d as a function of  $\text{Li}^+$  and  $\text{Na}^+$  concentration, from which the binding affinity of  $\text{Na}^+$  ( $k_d = 14$  mM) was evaluated to be lower than that of  $\text{Li}^+$  ( $k_d = 53$  mM), confirming the  $\text{Na}^+$  binding by the 2AP-modified Ce13d. Besides confirming  $\text{Na}^+$  binding, this result also highlights the advantage of 2AP probe compared with previous used  $\text{Tb}^{3+}$ -sensitized luminescence, in which 2AP signal is insensitive to non-specific interaction between metal ions and DNA (e.g.,  $\text{Li}^+$  causes little fluorescence change), while the latter is strongly influenced by competing ions (e.g.,  $\text{Li}^+$  also induces significant fluorescence decrease with higher concentrations).



**Figure S3.** Gel image showing the activity of the Ce13d in absence and presence of 10  $\mu\text{M}$   $\text{Ce}^{3+}$  after 1 h incubation. The assay was performed in 25 mM NaCl, 50 mM MES, pH 6.0. The result showed that without  $\text{Ce}^{3+}$ , the Ce13d is inactive in presence of  $\text{Na}^+$  alone.



**Figure S4.** Normalized fluorescence enhancement at 370 nm of the NaA43 with ribo-2AP or deoxyribo-2AP substrate as a function of Na<sup>+</sup> concentration. While the deoxy-2AP substrate yielded a slightly higher fluorescence increase, it is still less than 40% with 200 mM Na<sup>+</sup>.



**Figure S5.** Normalized 2AP fluorescence enhancement of various Ce13d mutants as a function of Na<sup>+</sup> concentration. All these mutants were demonstrated to bind Na<sup>+</sup> based on our previous Tb<sup>3+</sup> sensitized luminescence experiment (4). Among them, the A<sub>10</sub>C mutant displayed the highest fluorescence response, and therefore it is the best candidate for further studies.



**Figure S6.** Normalized fluorescence intensity at 370 nm of Ce13d-A<sub>9</sub>2AP (e.g. 2AP was introduced at A<sub>9</sub> position) as a function of salt concentration. In this case, no significant fluorescence decrease was observed with increasing concentration of both Na<sup>+</sup> and Li<sup>+</sup>. On the other hand, labeling the 2AP at the A<sub>8</sub> position had a significant Na<sup>+</sup>-dependent change of fluorescence, indicating that the fluorescence change observed in this work is mainly due to the Na<sup>+</sup> binding, instead of non-specific interactions.



**Figure S7.** The fluorescence spectra of our optimized Na<sup>+</sup> sensor (with deoxyribo-2AP substrate and the double mutant enzyme) in absence or presence of 50 mM Na<sup>+</sup>. The addition of 100 mM 18-crown-6 has little effect on the sensor response.



**Figure S8.** (A) The standard addition method for  $\text{Na}^+$  detection in Atlantic Ocean water. The sensor (200  $\mu\text{L}$ ) was mixed with the ocean water (6  $\mu\text{L}$ ), and then further titrated with  $\text{Na}^+$  stock solutions (1  $\mu\text{L}$  of each addition). With the linear increasing curve, the  $\text{Na}^+$  concentration was calculated to be 8.06 mM in the cuvette. Taking the dilution effect into consideration, the  $\text{Na}^+$  concentration was estimated to be 276 mM in the ocean water. (B) A comparison of  $\text{Na}^+$  concentration measured by  $\text{Na}^+$  sensor and standard ICP quantification, and each with the results of 276 mM and 266 mM  $\text{Na}^+$ , respectively. With the error range, the results obtained by both methods are identical.

#### Additional references.

1. Zuker, M. (2003) Mfold web server for nucleic acid folding and hybridization prediction. *Nucleic Acids Res.*, **31**, 3406-3415.
2. Huang, P.-J.J., Lin, J., Cao, J., Vazin, M. and Liu, J. (2014) Ultrasensitive DNAzyme beacon for lanthanides and metal speciation. *Anal. Chem.*, **86**, 1816-1821.

3. Zhou, W., Zhang, Y., Huang, P.-J.J., Ding, J. and Liu, J. (2016) A DNAzyme requiring two different metal ions at two distinct sites. *Nucleic Acids Res.*, **44**, 354-363.
4. Zhou, W., Ding, J. and Liu, J. (2016) A selective Na<sup>+</sup> aptamer dissected by sensitized Tb<sup>3+</sup> luminescence. *ChemBioChem*.
